1

2 **Multiple Geographical Origins of Environmental Sex Determination enhanced the**  
3 **diversification of Darwin's Favourite Orchids**

4

5 Oscar Alejandro Pérez-Escobar<sup>1\*</sup>; Guillaume Chomicki<sup>2</sup>; Fabien L. Condamine<sup>3</sup>;  
6 Jurriaan M. de Vos<sup>4\*</sup>; Aline C. Martins<sup>5</sup>; Eric C. Smidt<sup>5</sup>; Bente Klitgård<sup>1</sup>; Günter  
7 Gerlach<sup>6</sup>; Jochen Heinrichs<sup>2</sup>

8

9 <sup>1</sup> *Department of Identification and Naming, Royal Botanic Gardens Kew,*  
10 *Richmond, TW9 3AB, UK*

11 <sup>2</sup> *Department für Biologie I, Systematische Botanik und Mykologie, Ludwig-*  
12 *Maximilians-Universität, Menzinger Straße 67, D - 80638 München, Germany*

13 <sup>3</sup> *CNRS, UMR 5554 Institut de Sciences de l'Evolution (Université de*  
14 *Montpellier), Place Eugène Bataillon, 34095 Montpellier, France*

15 <sup>4</sup> *Department of Comparative Plant and Fungal Biology, Royal Botanic Gardens*  
16 *Kew, Richmond, TW9 3AB, United Kingdom*

17 <sup>5</sup> *Department of Botany, Federal University of Paraná, PB 19031, Curitiba, PR*  
18 *81531-980, Brazil*

19 <sup>6</sup> *Botanischer Garten München, Menzinger Straße 67, D - 80638 München,*  
20 *Germany*

21 <sup>\*</sup> *Corresponding author: [o.perez-escobar@kew.org](mailto:o.perez-escobar@kew.org); [j.devos@kew.org](mailto:j.devos@kew.org)*

22 **Running head:** Origin and effect of sexual plasticity on Catasetinae diversification

23 **Number of words:** 3396 (main text) and 7052 (including references and captions)

24 **Number of figures:** 3

25 **Number of tables:** 1

26 **Abstract [148 words]:**

27 Environmental sex determination (ESD) – a change in sexual function during an  
 28 individual life span driven by environmental cues – is an exceedingly rare sexual  
 29 system among angiosperms. Because ESD can directly affect reproduction  
 30 success, it could influence diversification rate as compared with lineages that  
 31 have alternative mating systems. Here we test this hypothesis using a solid  
 32 phylogenetic framework of Neotropical Catasetinae, the angiosperm lineage  
 33 richest in taxa with ESD. We assess whether gains of ESD are associated with  
 34 higher diversification rates compared to lineages with alternative systems while  
 35 considering additional traits known to positively affect diversification rates in  
 36 orchids. We found that ESD has evolved asynchronously three times during the  
 37 last ~5 Myr. Lineages with ESD have consistently higher diversification rates  
 38 than related lineages with other sexual systems. Habitat fragmentation due to  
 39 mega-wetlands extinction, and climate instability are suggested as the driving  
 40 forces for ESD evolution.

41 **Key words:** Sexual plasticity, reproduction, historical biogeography,  
 42 Orchidaceae, diversification

43

44

45

46

47

48

49 **Introduction**

Angiosperms have evolved a rich array of sexual systems that are unevenly distributed across lineages<sup>1,2</sup>. About 90% of angiosperms produce male and female reproductive organs in the same flower<sup>2-4</sup>. A small fraction of genera (i.e. 7%) include dioecious species, which bear sexes on separate individuals<sup>5</sup>. One unusual sexual system is referred to as labile sex expression, and involves changes in sex expression linked to environmental and phenotypic interactions<sup>6</sup>. A regular form of labile sex expression is the recurrent alternation of functionally male and female flower production over reproductive seasons<sup>5</sup> (e.g. duodichogamy in *Acer*<sup>6</sup>). However, a more extreme form of labile sexual expression is environmental sex determination (ESD), where an individual can change its sex in response to environmental variables such as sunlight and temperature<sup>3,6,7</sup>. Therefore, plants with ESD can produce male, female or bisexual flowers either on the same individual or in separate individuals depending on specific environmental conditions<sup>8</sup>. ESD is a rare sexual system in angiosperms and has so far been reported for only *ca* 450 species in three families<sup>5</sup>. Several authors proposed that habitat heterogeneity afforded by fragmentation may provide conditions where ESD would be beneficial<sup>7-9</sup>. Given the differential demand of resources by male (e.g. pollen production) and female (e.g. seed production) sex functions, ESD would enable the optimization of resource reallocation to either sex function in response to specific site characteristics.

Orchids, with about 25,000 species, are among the most species-rich families of flowering plants on earth<sup>10-12</sup>. They are well known for their diversity of reproductive systems<sup>13</sup>, but these remain poorly understood<sup>14,15</sup>. The vast majority of Orchidaceae produce male and female reproductive organs in

75 the same flower<sup>16</sup>. Indeed, orchid flowers exhibit an extreme case of  
 76 hermaphroditism in the plant kingdom because of the fusion of male and female  
 77 organs into a gynostemium<sup>17,18</sup>. An exception to this rule however are the  
 78 Catasetinae, a Neotropical orchid lineage containing 354 species<sup>19,20</sup>. Because of  
 79 their striking sexual systems (i.e. ESD, protandry, adichogamy) and the diversity  
 80 of pollination syndromes (e.g. male euglossine-bee pollination, oil bee  
 81 pollination)<sup>21,22</sup>, Catasetinae have long attracted the attention of botanists and  
 82 naturalists<sup>23</sup>. However, we still know little about the origin and evolution of  
 83 ESD in this lineage.

84 Catasetinae includes eight genera, namely *Catasetum*, *Clowesia*,  
 85 *Cyanaeorchis*, *Cynoches*, *Dressleria*, *Galeandra*, *Grobya* and *Mormodes*, and  
 86 most of the diversity is found in Central America and Amazonia regions<sup>24</sup>. Sex  
 87 expression in Catasetinae, as in several other plant lineages with ESD, is  
 88 regulated by ethylene production. The pioneer work of Gregg<sup>25</sup> documented the  
 89 role of sunlight exposure and ethylene synthesis on sex determination in  
 90 *Cynoches* and *Catasetum*. She convincingly demonstrated that ethylene  
 91 concentrations are about two- to 100-fold higher in inflorescence apices that are  
 92 fully exposed to sunlight compared with those kept in shade. Consequently,  
 93 inflorescences with higher ethylene concentration usually produce female  
 94 flowers, whereas those with lower levels produce male flowers<sup>25</sup>.

95 To date, about one third of the Catasetinae (i.e. *ca* 100 species) are  
 96 known to have ESD. Therefore, the group provides a unique opportunity to  
 97 study its evolutionary context in a phylogenetic framework. A recent study  
 98 provided strong support for three independent origins of sexual plasticity in  
 99 Catasetinae<sup>14,26</sup>. ESD evolved in *Catasetum*, *Cynoches* and *Mormodes*, always

100 from a protandrous ancestor. Protandry, in turn, was found to be the ancestral  
 101 condition in the so-called core Catasetinae (*Catasetum*, *Clowesia*, *Cycnoches*,  
 102 *Dressleria* and *Mormodes*). ESD could be a switch in the evolution of dioecy  
 103 (i.e. spatial separation of sexes)<sup>21</sup>, as observed in other plant lineages with sexual  
 104 plasticity such as *Fuchsia* and *Hebe*<sup>27–29</sup>.

105 It is still unclear whether the independent origins of ESD occurred  
 106 synchronously and under the same environmental conditions in a single  
 107 biogeographical region or evolved asynchronously in different regions, possibly  
 108 under different environmental conditions. It also remains elusive whether  
 109 lineages with ESD are associated with higher diversification rates compared  
 110 with hermaphroditic lineages. In view of its rarity, we hypothesise that ESD  
 111 could be a disadvantageous system leading to lower diversification rates.  
 112 Alternatively, ESD could be evolutionarily unstable and could thus represent a  
 113 transitional state rather than a stable reproductive system.

114 The extremely high orchid diversity is thought to be related with the  
 115 evolution of novel traits and the invasion of novel environments<sup>30</sup>, possibly  
 116 confounding analysis of the effects of ESD in orchid diversification. Therefore,  
 117 we also investigated the impact of epiphytism<sup>10,31</sup> and male euglossine-bee  
 118 pollination<sup>21,30</sup> on the diversification dynamics of Catasetinae. Epiphytism and  
 119 male euglossine-bee pollination are traits that occur in all ESD species of  
 120 Catasetinae, but these traits are shared with some Catasetinae species that have  
 121 alternative reproductive systems<sup>24</sup> (see *Methods*). Therefore, it is possible that  
 122 these traits might have influenced the diversification of the subtribe, yet their  
 123 specific contribution to diversification rates are still unknown.

124           The limited knowledge on the evolutionary dynamics of ESD in orchids  
 125 stems partly from the lack of well-sampled species-level phylogenies<sup>5</sup>. This is  
 126 particularly true for Catasetinae, in which previous studies did not attain even  
 127 taxon sampling, thus leaving species-rich clades dramatically underrepresented  
 128 (e.g. *Catasetum*; see<sup>32–34</sup>). In the current study, we generate the first densely  
 129 sampled phylogeny of Catasetinae. We combine data on species distribution and  
 130 a wide range of comparative phylogenetic methods to reconstruct the  
 131 evolutionary history of ESD. We then infer the biogeographic history of  
 132 Catasetinae, test whether their ESD lineages have higher diversification rates  
 133 than non-ESD lineages, while accounting for the possible contribution of other  
 134 traits to orchid diversification. We also investigate whether past and modern  
 135 climate niche preferences of lineages with ESD are divergent from non-ESD  
 136 lineages.

137

## 138   **Results**

### 139   *Phylogeny and molecular dating of Catasetinae*

140           Our DNA matrix included a total of 282 species, of which 132 belonged  
 141 to Catasetinae (i.e. ~37% of the extant diversity of the subtribe; Tab. S1).  
 142 Analyses based on Maximum Likelihood (ML) and Bayesian inference (BI)  
 143 recovered similar topologies. However, they revealed several conflicting  
 144 positions of species in the nuclear and plastid trees with bootstrap percentage  
 145 values (MLBS)  $\geq 75$  and/or posterior probabilities (PP)  $\geq 0.95$  (Fig. S1-S2).  
 146 Figure 1 and Figure S3 show the ML trees inferred from concatenated nuclear  
 147 and non-conflicting plastid sequences, respectively. Here, after exclusion of

148 conflicting positions from the DNA matrices (see *Methods* and Appendix S1 for  
149 a detailed explanation on incongruence handling), almost all backbone nodes of  
150 the phylogeny achieved  $MLBS \geq 75$  and  $PP > 0.95$  support.

151 Divergence time estimates performed under a Bayesian relaxed clock  
152 model yielded a mean Coefficient of Variation (CV) value for branch-specific  
153 substitution rates of 0.73, indicating substantial among-branch rate  
154 heterogeneity, confirming that the use of a relaxed molecular clock is  
155 appropriate. Mean ages and the associated 95% credibility intervals obtained  
156 under the relaxed clock model for all nodes are provided in Figure S4. The  
157 dating analyses showed that (i) the Catasetinae and Eulophiinae+Cyrtopodiinae  
158 shared a common ancestor in a time interval ranging from the early Miocene to  
159 the early Oligocene ( $25.93 \text{ Ma} \pm 5 \text{ Myrs}$ ), and (ii) the diversification of the  
160 Catasetinae most recent common ancestor (MRCA) started around  $19.5 \text{ Ma} \pm 4$   
161 Myrs during the early Miocene.

162

# 163 *Geographical origin of ESD and biogeographical history of Catasetinae*

164 Table S4 provides ML statistics for six biogeographical models as  
165 inferred using BIOGEOBEARS. The best fitting model was BayArea, including  
166 founder-event speciation ( $J$  parameter;  $\text{LnL}_{\text{best model}} = -860.3$  vs  $\text{LnL}_{\text{second best}}$   
167  $\text{model} = -875.5$ ;  $\text{AIC}_{\text{best model}} = 1727$  vs  $\text{AIC}_{\text{second best model}} = 1757$ ; Tab. S4). This  
168 model estimated south-eastern South America as the most likely ancestral area  
169 of Catasetinae (Fig. 2; Fig. S5). The same region was supported as the ancestral  
170 area of *Cyanaeorchis* and *Grobya*. In contrast, *Galeandra* and *Catasetum*  
171 inhabited larger areas between Amazonia+Guiana Shield+south-eastern South

172 America and Amazonia+south-eastern South America, respectively. The origins  
173 of *Clowesia* and *Cynchoes* were estimated to be in Amazonia, whereas the  
174 remaining lineages of Catasetinae (i.e. *Dressleria*, *Mormodes*) originated in  
175 Central America (Fig. 2; Fig. S5).

176

# 177 *Origin, climate niche and evolutionary dynamics of ESD*

178 Ancestral character estimation analysis under the best model (i.e. single  
179 transition rate) identified three independent gains of environmental sex  
180 determination, without any losses (Fig. 2; Fig. S6). ESD first evolved during the  
181 early Pleistocene to late Miocene (5 Ma  $\pm$  3 Myrs) at the MRCA of *Cynchoes* in  
182 the Amazonia region (Fig. 2; Fig. S5). Subsequently, two gains of ESD occurred  
183 towards the Pleistocene to Pliocene (3 Ma  $\pm$  1 Myrs) and the Pleistocene (1 Ma  
184  $\pm$  1 Myrs) in Amazonia – south-eastern South America and Central America  
185 regions, respectively. These gains took place at the MRCAs of *Catasetum* and a  
186 small clade of *Mormodes* species restricted to Central America and Northern  
187 Andes, respectively (Fig. 2; Fig. S5, S6). Lineages with ESD further diversified  
188 mostly in lowland areas (i.e. Amazonia, Choco, south-eastern South America,  
189 Central America, Guiana Shield. Two episodic colonisations from Central  
190 America towards Northern Andes were recovered.

191 Bioclimatic variables for 1372 georeferenced occurrences of Catasetinae  
192 were adequately captured by the first two axes of a principal component analysis  
193 (PCA) (47.9% and 23.6%, respectively). The first PCA axis received  
194 contributions from all bioclimatic variables except BIO 3 (isothermality), BIO 4  
195 (temperature seasonality), BIO 7 (temperature annual range), BIO 15

(precipitation seasonality), and altitude (Fig. S7). The second PCA axis mostly discriminated dry/hot environments, but also included contributions from BIO 15 (precipitation seasonality; Fig. S8). Therefore, discriminations between particular environments were not detected (Fig. S7-S9), as bioclimatic variables representing precipitation and temperature contributed similar amounts of variance to PCA axes 1 and 2 (**Fig. S7, S8**). Overall, the ordination of climatic niche space of lineages based on the bioclimatic variables indicated no evidence for general ecological segregation between lineages with and without ESD (**Fig. S9a**).

To further assess the apparent lack of climatic niche differentiation between ESD and non-ESD taxa, we excluded all auto-correlated variables (see *Methods*), and performed a non-metric dimensional analyses (NMDS) based on altitude, BIO 15 (precipitation seasonality), BIO 18 (precipitation of warmest quarter) and BIO 19 (precipitation of coldest quarter). Similarly, we found extensive overlaps between climatic niches of ESD and non-ESD lineages (Fig. S9b). However, climatic niche differentiation analysis using present-day bioclimatic variables are not directly informative of the climate niche preferences of ancestral lineages in which ESD arose. Thus, we performed ancestral character estimation analyses of twenty bioclimatic variables to assess whether ancestors having evolved ESD and those with alternative sexual systems diverged in their climatic niche preferences. We found that ancestral mean values of all bioclimatic variables were consistently similar between ancestors that independently evolved ESD and contemporary lineages with other sexual systems (Fig. 3). More importantly, ancestral mean bioclimatic values of lineages with and without ESD revealed little variation through time (Fig. S10).

221 Trait-dependent diversification rate analysis supported a model with free  
 222 speciation rates in lineages with and without ESD ( $\text{LnL}_{\text{best model}} = -248.85$ ;  
 223  $\text{AICc}_{\text{best model}} = 506.035$  vs.  $\text{LnL}_{\text{null model}} = -262.41$ ;  $\text{AICc}_{\text{null model}} = 531.022$ , Tab. 1;  
 224 Tab. S5). Under the best model, speciation rates were ~1.6-fold higher in  
 225 lineages with ESD, while extinction rates were modelled under the same  
 226 parameter (Fig. S11a; Tab. 1). We confirmed the robustness of these results  
 227 through our tailored data simulations (see *Methods*), that generated an  
 228 expectation about the distribution of  $\Delta\text{AIC}$  values obtained from randomly  
 229 reshuffled trait data (see *Extended Materials and Methods* of Appendix S1). The  
 230 distribution of simulated  $\Delta\text{AIC}$  did not overlap empirical AIC values. This  
 231 suggests that our trait-dependent analysis is not biased by type I error (Fig.  
 232 S14a).

233

# 234 *Evolutionary dynamics of male euglossine-bee pollination and epiphytism*

235 Binary-state dependent diversification analyses of male euglossine-bee  
 236 pollination and epiphytism supported models with free speciation rates and  
 237 equal extinction and transition rates ( $M_2$ ; see *Methods*), and free speciation and  
 238 transition rates but equal extinction rates ( $M_6$ ), respectively. Both models  
 239 recovered slightly higher speciation rates for male euglossine-bee pollination  
 240 (2.13 events/Myr; Fig. S12; Tab. 1; Tab. S6), and epiphytism (1.56 events/Myr;  
 241 Fig. S13; Tab. 1; Tab. S7) than for lineages with alternative reproductive  
 242 systems (1.82 events/Myr; Tab. S6) and plant habit (1.27 events/Myr; Tab. S7).  
 243 Analysis of simulated data confirmed the robustness of real data analysis results  
 244 for male euglossine-bee pollination. The distribution of  $\Delta\text{AIC}$  values from real  
 245 data and simulated data did not overlap:  $\Delta\text{AIC}_{\text{simulated}}$  was centred towards 30

units while the  $\Delta\text{AIC}_{\text{real data}}$  was estimated at 9 (Fig. S14b). Analysis of simulated data for epiphytism did not reach convergence, hence the veracity of binary-state dependent diversification analysis on the real data set could not be evaluated.

## Discussion

*Forest fragmentation as the context for the multiple geographical origins of ESD*

Orchids have a rich variety of reproductive systems<sup>35</sup>, of which hermaphroditism is the most widespread in the family<sup>16,35</sup>, reflecting the angiosperm-wide pattern<sup>2</sup>. The Catasetinae, however, have evolved three reproductive systems (i.e. adichogamy, dichogamy, and ESD<sup>14</sup>), thus providing a unique opportunity to investigate biotic and abiotic factors shaping the evolution of these sexual systems. By relying on a solid phylogenetic framework, divergence time estimations, and ancestral character estimation, our study demonstrates the independent temporal and geographic origins of ESD in Catasetinae. More importantly, it reveals for the first time an apparent positive correlation between gains of sexual plasticity and higher speciation rates. However, our analyses show that other traits (i.e. male euglossine-bee pollination<sup>21,30</sup>, and perhaps epiphytism<sup>30</sup>), may also have positively contributed to the diversification of the Catasetinae.

Ancestral area estimation analyses suggest that sexual plasticity first originated in the Amazonian region during the late Miocene (5 Ma  $\pm$  3 Myrs), a period preceded by the disappearance of large aquatic systems that dominated Amazonia from 17 to 7 Ma<sup>36</sup>. Such aquatic environments, known as Pebas Lake

270 and Acre Systems, ranged from the drainage of western Amazonia to the  
 271 Caribbean coast of Venezuela<sup>37,38</sup> and prompted the fragmentation of pre-  
 272 existing forests. The disappearance of Pebas and subsequent aquatic systems  
 273 towards the late Miocene gave rise to flood-plains with a patchy vegetation  
 274 dominated by palms, ferns and grasses<sup>38,39</sup>.

275       The late Miocene vegetation changes in the Amazonian region may also  
 276 be related to the global cooling subsequent to the mid-Miocene Climatic  
 277 Optimum (~15 Ma). These climate changes might have promoted forest  
 278 fragmentation by range expansions and contractions of species due to dramatic  
 279 temperature changes<sup>37,40,41</sup>. An example of the effect of drastic temperature  
 280 changes on vegetation ranges is the peculiar *Campos Rupestres* in Brazil. There,  
 281 dry periods provided the optimal conditions for vegetation to expand, allowing  
 282 species to expand their distribution ranges, and subsequently occupy larger  
 283 areas. Succeeding wetter periods would have prompted the contraction of  
 284 distribution ranges, leading to the formation of isolated vegetation patches<sup>42,43</sup>.  
 285 As a result, species like the orchids *Sarcoglottis caudata* and *Liparis beckeri*  
 286 now occupy very restricted ranges, whereas other taxa have a disjunctive  
 287 distribution, e.g. *Vellozia virgata*.

288       Sexual plasticity has been regarded as an adaption to patchy  
 289 environments<sup>7,8,44</sup>, and this might have explanatory power for the gains of sexual  
 290 plasticity in Catasetinae. The existence of patchy forests towards the end of the  
 291 late Miocene in South America and vegetation changes in Central America  
 292 might have facilitated the evolution of ESD by leading individuals to invest  
 293 different amounts of resources to male and female gamete production. Resource

294 reallocation to either function might thus have taken place as a function of an  
295 individual's specific site characteristics<sup>9,44</sup>.

296 In a seminal paper, Zimmerman<sup>45</sup> provided evidence towards the biased  
297 sex expression in *Catasetum viridiflavum*. In this species, female plants are more  
298 frequently distributed in open canopies whereas male plants often grow in closed  
299 canopies. Plants growing in open canopies are longer exposed to sunlight  
300 irradiation, thus favouring accumulation of energetic resources (i.e. plant  
301 biomass) that are later reallocated to female flower and fruit production<sup>45</sup>. The  
302 latter process requires considerable amounts of energy<sup>46</sup> because of the massive  
303 number of seeds produced in a single capsule (see below). Sunlight irradiation  
304 appears to be the main ecological variable driving male/female flower  
305 production ratio in Catasetinae<sup>25,45</sup>. However, how other variables tied to  
306 resource constrains and patch quality (e.g. substrate type<sup>45</sup>, orchid-mycorrhiza  
307 interactions<sup>47</sup>) affect sex ratios in the Catasetinae deserves further research.

308 *ESD, epiphytism and male euglossine-bee pollination enhanced*  
309 *diversification in Catasetinae*

310 The overwhelmingly low frequency of lineages with ESD compared to  
311 the vast majority of hermaphrodite angiosperms<sup>5</sup> could suggest that sexual  
312 plasticity is a disadvantageous mating system or that it is evolutionary unstable.  
313 However, our study shows that Catasetinae clades with ESD have higher  
314 speciation rates than those with other sexual systems (i.e. adichogamy,  
315 protandry; Fig. S11). Here, the overarching comparison of speciation rates  
316 obtained from all analysed traits revealed a greater contribution of ESD  
317 evolution to the diversification dynamics of Catasetinae (rates ~1.6-fold higher  
318 than in lineages with other sexual systems). In contrast, the evolution of

319 epiphytism (~1.2-fold higher) and male euglossine-bee pollination (~1.17-fold  
320 higher) affected diversification in the Catasetinae, but to a lesser extent.

321 Our ancestral character estimation analysis does not reveal any loss of  
322 ESD, suggesting that it is an evolutionary stable system in Catasetinae that has  
323 been maintained for up to 5 million years. Nevertheless, diversification in  
324 Catasetinae has also been prompted by the gain of traits that were earlier shown  
325 to influence diversification rates of Neotropical orchids in general (i.e. male  
326 euglossine-bee pollination<sup>21</sup>, epiphytism<sup>30,31</sup>). Taken together, these findings  
327 indicate that rate clad diversification is determined by several, potentially  
328 interacting factors<sup>30</sup>.

329 Vascular epiphytes are a key component of tropical forests<sup>48</sup>, and orchids  
330 account for 68% of the total vascular epiphyte diversity<sup>49</sup>. Epiphytism has  
331 evolved at least seven times since the Eocene in Orchidaceae<sup>50</sup>, and might have  
332 enhanced diversification by allowing colonization of new, largely unoccupied  
333 habitats such as branches and trunks of angiosperms<sup>30</sup>. In Catasetinae,  
334 epiphytism occurs in all members of the three most speciose genera, namely  
335 *Catasetum*, *Cynoches* and *Mormodes*<sup>24,51</sup> (290 species altogether<sup>20</sup>). It also  
336 occurs in all species of *Grobya*<sup>24</sup> (five species), *Clowesia* (seven species) and six  
337 of the eleven species of *Galeandra*<sup>52</sup>. Epiphytic species from such clades inhabit  
338 in a wide array of ecosystems and biogeographical regions<sup>24,53,54</sup>. Contrastingly,  
339 terrestrial species are confined to species-poor clades with restricted distribution  
340 such as *Dressleria* (twelve species), *Cyanaeorchis* (three species), and a clade of  
341 five species nested in *Galeandra*<sup>24,52,55</sup>.

342 Pollination by male euglossine-bee evolved independently three times in  
343 Orchidaceae since the early Miocene<sup>21</sup>. It may have accelerated diversification

344 rates by promoting switches in pollinators via small changes in the chemical  
 345 profile of the floral scent, or alternatively by changes in pollinarium placement  
 346 sites, hence allowing reproductive isolation<sup>30</sup>. Such pollination syndrome occurs  
 347 in all species of *Catasetum*, *Clowesia*, *Cynoches*, *Dressleria* and *Mormodes*,  
 348 which altogether make up ~85% of total species number in Catasetinae.  
 349 Alternative pollination syndromes (e.g. oil-bee pollination<sup>22</sup>, food deception)  
 350 occur in the remaining, species-poor genera of Catasetinae (i.e. *Cyanaeorchis*,  
 351 *Galeandra*, *Grobya*). Taken together, our results point to a prominent role of  
 352 ESD in the evolutionary dynamics of the Catasetinae, evidenced by speciation  
 353 rates ~1.6-fold higher than in orchids without ESD. Nonetheless, we do not  
 354 exclude the additional contributions of traits, such as euglossine-bee pollination  
 355 and epiphytism.

356       The reliability of our diversification rate results is strongly dependent on  
 357 the power and hypotheses testing ability of our trait-dependant diversification  
 358 model (i.e. BiSSE). The BiSSE method is known to be affected by within-clade  
 359 pseudoreplication<sup>56</sup>, and sample size<sup>57</sup>, issues that are inherent to the number of  
 360 independent origins of the analysed traits, and the sampling proportion of the  
 361 clade under study, respectively. Thus, extreme care must be used when  
 362 interpreting the outcome of trait-dependant diversification analyses<sup>57</sup>. However,  
 363 by comparing different trait-diversification models with randomly reshuffled  
 364 coding matrices in our simulations, and analysing other traits known to affect  
 365 diversification rates in orchids, we have partially accounted for pseudo-  
 366 replication bias. Indeed, our customized simulations revealed that BiSSE  
 367 analyses of ESD and male euglossine-bee pollination are not affected by Type I  
 368 errors. Nonetheless, diversification rate analyses can only account for the effects

369 of the traits here considered, hence we cannot entirely rule out that other  
370 variables have additional effects<sup>56</sup>.

371

372 *ESD, protandry and adichogamy share the same climatic niche in Catasetinae*

373 We have not detected significant differences in the ancestral and modern  
374 climate niches between Catasetinae lineages with ESD and other sexual systems  
375 (Fig. 3; Figs. S9-S10). Thus, particular temperature or precipitation regimes do  
376 not appear to have favoured any of these lineages. Species with ESD that occur  
377 often in habitats with longer sunlight exposure compared to species without  
378 ESD, produce bigger pseudobulbs, female flowers and fruits<sup>45,58</sup>. These species  
379 also produce larger capsules than Catasetinae lineages with protandry or  
380 adichogamy (e.g. *Cyanaeorchis*, *Clowesia*, *Dressleria*; Pérez-Escobar, pers.  
381 obs.). For instance, the capsules of *Cynoches chlorochilon* produce on average  
382 up to three times more seeds (3,770,000) than fruits of *Cymbidium tracyanum*  
383 (850,000), an adichogamous species closely related to Catasetinae<sup>46</sup>. Therefore,  
384 under the same climatic niche, Catasetinae lineages with ESD might have  
385 produced more offspring than lineages with other sexual systems. However,  
386 additional data on fruit size and particularly on seed content for all Catasetinae  
387 members are needed to statistically test such assumption.

388 Occurrence of ESD requires a heterogeneous habitat (e.g. fragmented  
389 forest matrix), because under homogenous ecological conditions (e.g. forest  
390 understory) plants with ESD will bear predominantly one sex form, and mating  
391 success may thus be dramatically reduced. This highlights the important role of  
392 climate instability and its effects on habitat heterogeneity since the Miocene

Climate Optimum in the evolution and maintenance of ESD. Nevertheless, it is likely that bioclimatic variables do not represent relevant environmental aspects of the niche in which ESD orchids occurs as compared with non-ESD lineages. Also, the climatic niche analyses pinpoint the explanatory power of variables with maximum variance, hence they will be mostly represented in PCA axes 1 and 2. However, such variables are not necessarily the most relevant and informative for our group of study. Therefore, even though ESD and non-ESD species niches largely overlap, ESD lineages might still be dependent on more specific ecological variables that are not necessarily captured by bioclimatic variables but that may yet be driven by climate (e.g. those operating on forest edge matrices<sup>59</sup>, or affecting physiognomic properties of vegetation).

## Conclusions

Environmental Sex Determination (ESD) in Catasetinae has long attracted and even confused<sup>60</sup> botanists and naturalists<sup>23</sup>, and the evolutionary and biogeographic context for the evolution of this remarkable trait remained elusive before our study. Our results show that the evolution of ESD involved multiple gains in three biogeographical regions between late Miocene and late Pleistocene - geological periods that were marked by the extinction of pivotal aquatic environments and mega-wetlands<sup>36,39</sup> and dramatic fluctuations in temperature<sup>61</sup>. Fragmentation of vegetation prompted by the demise of these aquatic systems in South America and by dramatic changes in temperature across the Neotropics might have fostered the evolution of sexual plasticity in Catasetinae. In spite of the extreme rarity of sexual plasticity among the rich array of angiosperm reproductive systems<sup>5</sup>, evolution of ESD in Catasetinae

appears to be correlated with higher speciation rates. Other traits such as male euglossine-bee pollination and epiphytism, however, also appear to have positively influenced the spectacular diversity of Catasetinae. This illustrates the difficulty in isolating the effect of one trait on diversification rates from effects of others. The genetic contribution of an individual to future generations is enhanced by ESD because it promotes the development of the sex most suited for specific environmental conditions (i.e. sunlight intensity in Catasetinae<sup>8,44</sup>). We demonstrate that ESD-bearing Catasetinae inhabit the same climatic niche as their non-ESD relatives. Thus, plants with ESD might produce more offspring over plants having alternative sexual systems because of the increased opportunities for optimizing resource allocation to male and female function at each growing site.

## Materials and methods

### *Taxon sampling, DNA sequencing and phylogenetic analyses*

Species names, geographical origins, voucher specimens, and GenBank accession numbers of sequences included in phylogenetic analyses are provided in Table S1. We built our alignment based on the molecular datasets of Whitten et al.<sup>33</sup>, Salazar et al.<sup>51</sup>, Neubig et al.<sup>62</sup>, Bone et al.<sup>63</sup>, and Pérez-Escobar et al.<sup>34,64</sup>, and further generated 57 nuclear ribosomal and 25 plastid sequences for poorly sampled lineages such as *Catasetum*, *Dressleria* and *Grobya* (Tab. S1). Because the precise position of Catasetinae inside the tribe Cymbidieae was elusive<sup>33,55</sup>, we also sampled selected representatives of closely related subtribes (i.e. Cyrtopodiinae, Dipodiinae, Eulophiinae, and Oncidiinae). Genomic DNA extraction, amplification, sequencing and alignment procedures are the same as

443 in Irimia et al.<sup>65</sup>, Pérez-Escobar et al.<sup>14</sup>, and Bechteler et al.<sup>66</sup>. For the newly  
 444 sampled taxa, we sequenced nuclear ribosomal external and internal transcribed  
 445 spacers (ETS and ITS, respectively), a fragment of the *Xdh* gene, and also a  
 446 ~1500 bp fragment of the plastid gene *ycf1*, and the *trnS*–*trnG* intergenic spacer.  
 447 Amplification settings and sequencing primers used for ITS, ETS, *Xdh*, *trnS*–  
 448 *trnG*, and *ycf1* are specified in Table S2.

449 Loci were aligned using MAFFT 7.1<sup>67</sup> and were further manually checked,  
 450 yielding a total matrix of 281 taxa and 8104 nucleotides (~24% parsimony informative  
 451 sites). Congruence between nuclear and plastid datasets was assessed following Pérez-  
 452 Escobar et al.<sup>34</sup>, and using PACo<sup>68</sup> (Appendix S1). The procedure is available as a  
 453 pipeline (<http://www.uv.es/cophylpaco/>) and was also employed to identify operational  
 454 terminal units (OTUs) from the plastid dataset conflicting with the nuclear dataset  
 455 (potential outliers detected by PACo are shown in Fig. S1-S2). A detailed explanation  
 456 on PACo and a rationale on outlier handling is provided in the Extended Materials and  
 457 Methods section of Appendix S1.

458 Phylogenetic analyses of separate and concatenated loci were carried out  
 459 under maximum likelihood (ML) and Bayesian inference (BI), following Pérez-  
 460 Escobar et al.<sup>14,34</sup>, and Feldberg et al.<sup>69</sup>. The best-fitting substitution models for  
 461 ML and Bayesian analyses were obtained for each data partition using  
 462 jModelTest v.2.1.6<sup>70</sup> (Tab. S3). Phylogenetic inference relied on the ML and BI  
 463 approaches implemented in RAxML-HPC 8.2.4<sup>71</sup> and MrBayes 3.2.2<sup>72</sup>,  
 464 respectively, and were carried out on the CIPRES Science Gateway computing  
 465 facility<sup>73</sup>. Maximum likelihood bootstrap supports (MLBS) were generated for  
 466 the ML tree and MLBS  $\geq 75\%$  considered as good support, and Bayesian

467 Posterior Probabilities (PP)  $\geq 0.95$  for the Bayesian majority rule consensus  
468 topology were regarded as significant<sup>74,75</sup>.

469

#### 470 *Molecular clock dating*

471 Divergence time estimates were conducted using the Bayesian relaxed  
472 clock approach of BEAST 2.1.3<sup>76</sup> with a concatenated nuclear+plastid subset of  
473 the data obtained after the PACo analysis. Strict and uncorrelated lognormal  
474 molecular clock models, both with pure-birth speciation models as  
475 recommended for species level sampling<sup>77</sup>, were compared to explore clock-  
476 likeness of the data. For calibrating the relaxed clock model, there are few  
477 fossils unambiguously assigned to Orchidaceae<sup>78</sup>, and these are placed to  
478 lineages very distantly related to Catasetinae (i.e. *Dendrobium*, *Earina*, both  
479 Vandaeae). Recently, a new putative orchid fossil from the Dominican amber  
480 (early - middle Miocene, 15-20 Ma) was described and assigned to the tribe  
481 Cymbidieae<sup>79</sup>. However, the author provided no evidence to unambiguously  
482 assign such fossil to Cymbidieae or orchids in general. Secondary calibrations  
483 are therefore the only option for dating the tree of Catasetinae. To this end, we  
484 relied on the age estimates obtained from a fossil-calibrated global phylogeny of  
485 Orchidaceae<sup>50</sup>, which were set with normally distributed priors that reflected  
486 uncertainty in the primary analysis<sup>76</sup>. Settings for absolute age estimation are  
487 detailed in the *Extended Materials and Methods* of Appendix S1.

488

#### 489 *Ancestral areas estimation*

490 Species ranges were coded from the literature<sup>19,60</sup> and from herbarium  
491 specimens housed in the herbaria AMES, COL, F, M, MO, SEL, US, using the

492 R-package SpeciesGeoCoder<sup>80</sup>. Distribution data were also obtained from own  
 493 field observations. Biogeographical areas were defined considering putative  
 494 areas of endemism of Catasetinae as well as species distributions observed in  
 495 other plant lineages such as Rubiaceae<sup>37</sup> and Bromeliaceae<sup>81</sup>. We divided the  
 496 geographical range of Catasetinae and outgroup taxa in eight biogeographic  
 497 regions (see *Extended Materials and Methods* of Appendix S1 for a detailed  
 498 description of coded areas): (1) Central America; (2) Guiana Shield; (3)  
 499 Amazonia<sup>37</sup>; (4) Chocó; (5) Northern Andes; (6) Central Andes; (7) South-  
 500 eastern South America; and (8) Africa and Australasia. We used the R-package  
 501 BIOGEOBEARS (Biogeography with Bayesian and Likelihood Evolutionary  
 502 Analysis in R script<sup>82</sup>) to estimate ancestral areas on the phylogeny of  
 503 Catasetinae.

504

# 505 *Climatic niche analyses*

506 We mapped georeferenced collection records obtained from floras, GBIF  
 507 database and herbarium specimens (mean of five specimens per species,  
 508 maximum number of record per species set to ten), and they represent the known  
 509 distribution of extant Catasetinae species included in our taxon sampling. To  
 510 query GBIF database, we relied on the function *occ* of the R-package SPOCC<sup>83</sup>.  
 511 We further extracted corresponding values of altitude and 19 climatic variables  
 512 (30 seconds resolution) reflecting temperature and precipitation regimes from  
 513 the WorldClim database (available at: <http://www.worldclim.org/current>), using  
 514 the function *extract* of the R-package RASTER<sup>84</sup>. To characterise the climate-  
 515 niche occupied by Catasetinae lineages with ESD or other sexual systems, we  
 516 performed Principal Component Analysis (PCA) on the mean values of the 20

environmental variables of each species, using the default function *princomp* of the R (Fig. S7). We further explored the contribution of bioclimatic variables to axes with the most variance by plotting the loadings of every bioclimatic variable onto the axes (Fig. S8, S9).

To avoid spurious results arising from inclusion of correlated variables<sup>63,85</sup>, we determined the Pearson's correlation coefficients between the variables and altitude and then included only variables with a Pearson's correlation coefficient <0.5, taking a single variable in correlated clusters. This way, we selected altitude, BIO 15 (precipitation seasonality), BIO 18 (precipitation of warmest quarter) and BIO 19 (precipitation of coldest quarter) as a set of maximally uncorrelated variables. We analysed these variables using the R-package VEGAN<sup>86</sup> to perform non-dimensional metric scaling analyses (NMDS) using the dataset of 1372 georeferenced herbarium specimens.

530

### 531 *Ancestral character estimation*

We coded for absence (state 0) and presence (state 1) of ESD in 131 species of Catsetinae, plus eight taxa of Cyrtopodiinae (see below). We sampled 68 of the 164 known species with ESD in Catsetinae (i.e. ~41% of the ESD diversity). Information on occurrence of ESD was obtained from the literature<sup>24,58,87</sup>. We estimated the origin of ESD within Catsetinae using a stochastic character mapping approach implemented on a maximum likelihood framework for ancestral character estimation analysis (ACE) implemented by the function *make.simmap* in the R-package PHYTOOLS<sup>88</sup>. Under this approach, we fitted single (ER), symmetrical (SYM), and asymmetrical

541 character transition rate models (ARD) and performed stochastic mapping on  
542 1000 iterations using the maximum clade credibility tree derived from the  
543 BEAST dating analysis (see above). Eight members of the Neotropical genus  
544 *Cyrtopodium* were selected as outgroup taxa, and they exhibit hermaphroditic  
545 flowers (i.e. no ESD).

546 To assess whether ancestors with ESD and those with alternative sexual  
547 systems differed in their climatic niche preferences back in time, we performed  
548 ACE analyses of the same nineteen bioclimatic variables plus altitude, obtained  
549 from georeferenced occurrences (see *Climate niche analyses* section of  
550 *Methods*). ACE of absolute mean values relied on a Maximum Likelihood  
551 framework, and were performed on a phylogeny derived from the character  
552 stochastic mapping analysis of ESD (using ER as transition rate model, see  
553 *Results*). We then visualized the variation through time of all variables (**Fig. 3**),  
554 using the function *phenogram* of the R-package PHYTOOLS<sup>88</sup>. We also plotted  
555 mean ancestral values and their corresponding 95% confidence intervals (CI)  
556 estimated for every node of the Catasetinae phylogeny, using the R-package  
557 GGPLOT2<sup>89</sup> (Fig. S10).

558

#### 559 *Trait-dependent diversification analyses*

560 We tested whether lineages with ESD (state 1) had higher speciation rates  
561 than hermaphroditic, monoecious clades (state 0). In addition, to tease apart the  
562 contribution of biotic variables to Catasetinae diversification that are known to  
563 positively influence diversification rates in orchids, we investigated the  
564 evolutionary dynamics of male euglossine-bee pollination and epiphytism in the

subtribe. The former trait occurs in all species of the genera *Catasetum*,  
*Clowesia*, *Cynoches*, *Mormodes* and *Dressleria*<sup>21,24,90</sup>, while the latter occur in  
all species of *Catasetum*, *Clowesia*, *Cynoches*, *Mormodes*, *Dressleria*<sup>24</sup>, and  
part of *Galeandra* species<sup>52</sup>. We relied on the Binary State Speciation and  
Extinction (BiSSE) model<sup>91</sup> to estimate diversification rates associated with each  
trait. We used the R-package DIVERSITREE<sup>91</sup> to perform eight diversification  
models in the maximum likelihood framework on 100 randomly sampled dated  
trees from the Bayesian divergence times analysis. We tested eight models with  
different configurations of speciation, extinction, and transition rates between  
characters. Detailed settings for binary-trait dependent diversification analyses,  
and simulations to account for type I error biases<sup>92</sup> are provided in Appendix S1.

## References

1. Barrett, S. C. H. The evolution of plant reproductive systems: how often are transitions irreversible? *Proc. R. Soc. B Biol. Sci.* **280**, 1–9 (2013).
2. Barrett, S. C. H. The evolution of plant sexual diversity. *Nat. Rev. Genet.* **3**, 274–284 (2002).
3. Tanurdzic, M. & Banks, J. A. Sex-determining mechanisms in land plants. *Plant Cell* **16**, 61–72 (2004).
4. Bateman, R. M., Hilton, J. & Rudall, P. J. in *Flowers on the tree of life* (eds. Wanntorp, L. & De Craene, L.) 315 (Cambridge University Press, 2011).
5. Renner, S. S. The relative and absolute frequencies of angiosperm sexual systems: dioecy, monoecy, gynodioecy, and an updated online database. *Am. J. Bot.* **101**, 1588–1596 (2014).
6. Renner, S. S., Beenken, L., Grimm, G. W., Kocyan, A. & Ricklefs, R. E. The evolution of dioecy, heterodichogamy, and labile sex expression in *Acer*. *Evolution* **61**, 2701–2719 (2007).
7. Charnov, E. L. & Bull, J. When is sex environmentally determined? *Nature* **266**, 828–830 (1977).
8. Korpelainen, H. Labile sex expression in plants. *Biol. Rev. Camb. Philos. Soc.* **73**, 157–180 (1998).
9. Guillon, J., Julliard, R. & Leturque, H. Evolution of habitat-dependent sex allocation in plants: superficially similar to, but intrinsically different from animals. *J. Evol. Biol.* **19**, 500–512 (2006).

- 598 10. Dodson, C. H. Why are there so many orchid species □? *Lankesteriana* **7**, 99–103  
599 (2003).
- 600 11. Fay, M. F. & Chase, M. W. Orchid biology: From Linnaeus via Darwin to the  
601 21st century. *Ann. Bot.* **104**, 359–364 (2009).
- 602 12. Bateman, R. M. & Rudall, P. J. The good, the bad and the ugly: using naturally  
603 occurring terata to distinguish the possible from the impossible in the orchid  
604 floral evolution. *Aliso* **22**, 481–496 (2006).
- 605 13. Borba, E. L., Barbosa, A. R., Melo, M. C., Gontijo, S. L. & Oliveira, H. O.  
606 Mating systems in the Pleurothallidinae (Orchidaceae): evolutionary and  
607 systematic implications. *Lankesteriana* **11**, 207–221 (2011).
- 608 14. Pérez-Escobar, O. A., Gottschling, M., Whitten, W. M., Salazar, G. & Gerlach,  
609 G. Sex and the Catsetinae (Darwin's favourite orchids). *Mol. Phylogenet. Evol.*  
610 **97**, 1–10 (2016).
- 611 15. Pérez-Escobar, O. A. *et al.* Recent origin and rapid speciation of Neotropical  
612 orchids in the world's richest plant biodiversity hotspot. *New Phytol.* **215**, 891–  
613 905 (2017).
- 614 16. Dressler, R. L. *Phylogeny and classification of the orchid family*. **20**,  
615 (Dioscorides Press, 1993).
- 616 17. Rudall, P. J. & Bateman, R. M. Roles of synorganisation, zygomorphy and  
617 heterotopy in floral evolution: the gynostemium and labellum of orchids and  
618 other lilioid monocots. *Biol. Rev* **77**, 403–441 (2002).
- 619 18. Rudall, P. J., Perl, C. D. & Bateman, R. M. Organ homologies in orchid flowers  
620 re-interpreted using the Musk Orchid as a model. *PeerJ* **1**, e26 (2013).
- 621 19. Romero, G. A. in *Genera Orchidacearum: Vol. 5. Epidendroideae (part two)*  
622 (eds. Pridgeon, A. M., Cribb, P. J., Chase, M. W. & Rasmussen, F. N.) 11–40  
623 (Oxford University Press, 2009).
- 624 20. Chase, M. W. *et al.* An updated classification of Orchidaceae. *Bot. J. Linn. Soc.*  
625 **177**, 151–174 (2015).
- 626 21. Ramirez, S. R. *et al.* Asynchronous diversification in a specialized plant-  
627 pollinator mutualism. *Science* **333**, 1742–1746 (2011).
- 628 22. Pansarin, L. M., Castro, M. D. E. M. & Sazima, M. Osmophore and elaiophores  
629 of *Grobya amherstiae* (Catsetinae, Orchidaceae) and their relation to  
630 pollination. *Bot. J. Linn. Soc.* **159**, 408–415 (2009).
- 631 23. Darwin, C. *On the various contrivances by which british and foreign orchids are*  
632 *fertilised by insects*. (Appleton and CO., 1877).
- 633 24. Pridgeon, A. M., Cribb, P. J., Chase, M. W. & Rasmussen, F. N. *Genera*  
634 *Orchidacearum: Vol. 5. Epidendroideae (part two)*. (Oxford University Press,  
635 2009).
- 636 25. Gregg, K. B. Sunlight-enhanced ethylene evolution by developing inflorescences  
637 of *Catsetum* and *Cynoches* and its relation to female flower production. *Bot.*  
638 *Gaz.* **143**, 466–475 (1982).
- 639 26. Perez-escobar, O. A. Molecular phylogenetics, evolution of sexual systems and  
640 historical biogeography of Darwin's favorite orchids (Catsetinae) and Swan

- orchids (*Cynoches* Lindl.). (Ludwig-Maximilians Universität, 2016).
27. Atsatt, P. R. & Rundel, P. W. Pollinator maintenance vs. fruit production: partitioned reproductive effort in subdioecious *Fuchsia lycioides*. *Ann. Missouri Bot. Gard.* **69**, 199–208 (1982).
28. Delph, L. F. Sex-differential resource allocation patterns in the subdioecious shrub *Hebe subalpina*. *Ecology* **71**, 1342–1351 (1990).
29. Delph, L. F. & Wolf, D. E. Evolutionary consequences of gender plasticity in genetically dimorphic breeding systems. *New Phytol.* **166**, 119–128 (2004).
30. Givnish, T. J. *et al.* Orchid phylogenomics and multiple drivers of their extraordinary diversification. *Proc. R. Soc. B Biol. Sci.* **282**, 20151553 (2015).
31. Gravendeel, B., Smithson, A., Slik, F. J. W. & Schuiteman, A. Epiphytism and pollinator specialization: drivers for orchid diversity? *Philos. Trans. R. Soc. Lond. B. Biol. Sci.* **359**, 1523–1535 (2004).
32. Romero-González, G. A., Batista, J. & Bem, L. A Synopsis of the genus *Cyrtopodium* (Catasetinae □: Orchidaceae). *Harvard Pap. Bot.* **13**, 189–206 (2008).
33. Whitten, W. M., Neubig, K. M. & Williams, N. H. Generic and subtribal relationships in neotropical Cymbidieae (Orchidaceae) based on *matK/ycf1* plastid data. *Lankesteriana* **13**, 375–392 (2014).
34. Pérez-Escobar, O. A., Balbuena, J. A. & Gottschling, M. Rumbling orchids: how to assess divergent evolution between chloroplast endosymbionts and the nuclear host. *Syst. Biol.* **65**, 51–65 (2016).
35. Tremblay, R. L., Ackerman, J. D., Zimmerman, J. K. & Calvo, R. N. Variation in sexual reproduction in orchids and its evolutionary consequences: a spasmodic journey to diversification. *Biol. J. Linn. Soc.* **84**, 1–54 (2005).
36. Hoorn, C. *et al.* Amazonia through time: andean uplift, climate change, landscape evolution, and biodiversity. *Science* **330**, 927–931 (2010).
37. Antonelli, A., Nylander, J. A. A., Persson, C. & Sanmartín, I. Tracing the impact of the Andean uplift on Neotropical plant evolution. *Proc. Natl. Acad. Sci. U. S. A.* **106**, 9749–9754 (2009).
38. Antonelli, A. & Sanmartín, I. Why are there so many plant species in the Neotropics? *Taxon* **60**, 403–414 (2011).
39. Hoorn, C. An environmental reconstruction of the palaeo-Amazon River system (Middle–Late Miocene, NW Amazonia). *Palaeogeogr. Palaeoclimatol. Palaeoecol.* **112**, 187–238 (1994).
40. Gentry, A. H. Neotropical floristic diversity: phytogeographical connections between Central and South America, Pleistocene climatic fluctuations, or an accident of the Andean orogeny? *Ann. Missouri Bot. Gard.* **69**, 557–593 (1982).
41. Pokorny, L. *et al.* Living on the edge: timing of Rand Flora disjunctions congruent with ongoing aridification in Africa. *Front. Genet.* **6**, 1–15 (2015).
42. Alves, R. V. & Kolbek, J. Plant species endemism in savanna vegetation on table mountains (*Campo Rupestre*) in Brazil. *Vegetatio* **113**, 125–139 (1994).
43. Antonelli, A., Verola, C. F., Parisod, C. N. & Gustafsson, a. L. S. Climate

- 684       cooling promoted the expansion and radiation of a threatened group of South  
685       American orchids (Epidendroideae: Laeliinae). *Biol. J. Linn. Soc.* **100**, 597–607  
686       (2010).
- 687   44.   Freeman, D. C., Harper, K. T. & Charnov, E. L. Sex change in plants: old and  
688       new observations and new hypotheses. *Oecologia* **47**, 222–232 (1980).
- 689   45.   Zimmerman, J. K. Ecological correlates of labile sex expression in the orchid  
690       *Catasetum viridiflavum*. *Ecology* **72**, 597–608 (1991).
- 691   46.   Arditti, J. & Ghani, A. K. A. Numerical and physical properties of orchid seeds  
692       and their biological implications. *New Phytol.* **145**, 367–421 (2000).
- 693   47.   Yukawa, T., Ogura-Tsujita, Y., Shefferson, R. P. & Yokoyama, J. Mycorrhizal  
694       diversity in *Apostasia* (Orchidaceae) indicates the origin and evolution of orchid  
695       mycorrhiza. *Am. J. Bot.* **96**, 1997–2009 (2009).
- 696   48.   Gentry, A. H. & Dodson, C. H. Diversity and biogeography of Neotropical  
697       vascular epiphytes. *Ann. Missouri Bot. Gard.* **74**, 205–233 (1987).
- 698   49.   Zotz, G. The systematic distribution of vascular epiphytes – a critical update. *Bot.*  
699       *J. Linn. Soc.* **171**, 453–481 (2013).
- 700   50.   Chomicki, G. *et al.* The velamen protects photosynthetic orchid roots against  
701       UV-B damage, and a large dated phylogeny implies multiple gains and losses of  
702       this function during the Cenozoic. *New Phytol.* **205**, 1330–1341 (2015).
- 703   51.   Salazar, G. A., Cabrera, L. I., Gerlach, G., Hágsater, E. & Chase, M. W.  
704       Phylogenetic relationships in *Mormodes* (Orchidaceae, Cymbidieae, Catasetinae)  
705       inferred from nuclear and plastid DNA sequences and morphology. *Phytotaxa*  
706       **263**, 18–30 (2016).
- 707   52.   Monteiro, S. H. N., Selbach-Schnadelbach, A., de Oliveira, R. P. & van den  
708       Berg, C. Molecular phylogenetics of *Galeandra* (Orchidaceae: Catasetinae) based  
709       on plastid and nuclear DNA sequences. *Syst. Bot.* **35**, 476–486 (2010).
- 710   53.   Pérez-Escobar, O. A., Parra-Sánchez, E. & Valdivieso, P. O. Inventario  
711       orquideológico de la Reserva Bosque de Yotoco, Valle del Cauca. *Acta*  
712       *Agronómica* **58**, 189–196 (2009).
- 713   54.   Kolanowska, M., Pérez-Escobar, O. A., Parra-Sánchez, E. & Szlachetko, D. L.  
714       *An illustrated field guide to the orchids of the Yotoco Forest Reserve (Colombia).*  
715       (Wydawnictwo Uniwersytetu Gdańskiego, 2011).
- 716   55.   Batista, J. N. *et al.* Molecular phylogenetics of Neotropical *Cyanaeorchis*  
717       (Cymbidieae, Epidendroideae, Orchidaceae): geographical rather than  
718       morphological similarities plus a new specie. *Phytotaxa* **156**, 251–272 (2014).
- 719   56.   Maddison, W. P. & Fitzjohn, R. G. The unsolved challenge to phylogenetic  
720       correlation tests for categorical characters. *Syst. Biol.* **64**, 127–136 (2015).
- 721   57.   Davis, M. P., Midford, P. E. & Maddison, W. Exploring power and parameter  
722       estimation of the BiSSE method for analyzing species diversification. *BMC Evol.*  
723       *Biol.* **13**, 38–49 (2013).
- 724   58.   Gregg, K. B. Variation in floral fragrances and morphology□: incipient  
725       speciation in *Cynoches*? *Bot. Gaz.* **144**, 566–576 (1983).
- 726   59.   Parra-Sánchez, E., Retana, J. & Armenteras, D. Edge Influence on diversity of

- orchids in Andean cloud forests. *Forests* **7**, 1–13 (2016).
60. Carr, G. F. J. The genus *Cynoches*: species and hybrids. *Orchid Rev.* 1–31 (2012).
61. Zachos, J. C., Dickens, G. R. & Zeebe, R. E. An early Cenozoic perspective on greenhouse warming and carbon-cycle dynamics. *Nature* **451**, 279–283 (2008).
62. Neubig, K. M. *et al.* Generic recircumscriptions of Oncidiinae (Orchidaceae): Cymbidiaceae) based on Maximum Likelihood analysis of combined DNA datasets. *Bot. J. Linn. Soc.* 117–146 (2012).
63. Bone, R. E., Smith, J. A. C., Arrigo, N. & Buerki, S. A macro-ecological perspective on crassulacean acid metabolism (CAM) photosynthesis evolution in Afro-Madagascan drylands: Eulophiinae orchids as a case study. *New Phytol.* **208**, 469–481 (2015).
64. Pérez-Escobar, O. A. *et al.* Andean mountain building did not preclude dispersal of lowland epiphytic orchids in the Neotropics. *Sci. Rep.* **7**, 4919 (2017).
65. Irimia, R.-E., A. Pérez-Escobar, O. & Gottschling, M. Strong biogeographic signal in the phylogenetic relationships of *Rochefortia* Sw. (Ehretiaceae, Boraginales). *Plant Syst. Evol.* **301**, 1509–1516 (2014).
66. Bechteler, J. *et al.* Geographical structure, narrow species ranges, and Cenozoic diversification in a pantropical clade of epiphyllous leafy liverworts. *Ecol. Evol.* **7**, 638–653 (2017).
67. Katoh, K. & Standley, D. M. MAFFT multiple sequence alignment software version 7: improvements in performance and usability. *Mol. Biol. Evol.* **30**, 772–780 (2013).
68. Balbuena, J. A., Míguez-Lozano, R. & Blasco-Costa, I. PACo: a novel procrustes application to cophylogenetic analysis. *PLoS One* **8**, e61048 (2013).
69. Feldberg, K. *et al.* A phylogeny of Cephaloziaceae (Jungermanniopsida) based on nuclear and chloroplast DNA markers. *Org. Divers. Evol.* **16**, 727–742 (2016).
70. Darriba, D., Taboada, G. L., Doallo, R. & Posada, D. jModelTest 2: more models, new heuristics and parallel computing. *Nat. Methods* **9**, 772–772 (2012).
71. Stamatakis, A. RAxML version 8: A tool for phylogenetic analysis and post-analysis of large phylogenies. *Bioinformatics* **30**, 1312–1313 (2014).
72. Ronquist, F. *et al.* Mrbayes 3.2: Efficient Bayesian phylogenetic inference and model choice across a large model space. *Syst. Biol.* **61**, 539–542 (2012).
73. Miller, M. A. *et al.* A RESTful API for access to phylogenetic tools via the CIPRES Science Gateway. *Evol. Bioinforma.* **11**, 43–48 (2015).
74. Erixon, P., Svennblad, B., Britton, T. & Oxelman, B. Reliability of Bayesian posterior probabilities and bootstrap frequencies in phylogenetics. *Syst. Biol.* **52**, 665–673 (2003).
75. Douady, C. J., Delsuc, F., Boucher, Y., Doolittle, W. F. & Douzery, E. J. P. Comparison of Bayesian and maximum likelihood bootstrap measures of phylogenetic reliability. *Mol. Biol. Evol.* **20**, 248–254 (2003).
76. Drummond, A. J. & Bouckaert, R. R. *Bayesian evolutionary analysis with BEAST 2*. (Cambridge University Press, 2014).

- 770 77. Bouckaert, R. *et al.* BEAST 2: a software platform for Bayesian evolutionary  
771 analysis. *PLoS Comput. Biol.* **10**, 1–6 (2014).
- 772 78. Ramírez, S. R., Gravendeel, B., Singer, R. B., Marshall, C. R. & Pierce, N. E.  
773 Dating the origin of the Orchidaceae from a fossil orchid with its pollinator.  
774 *Nature* **448**, 1042–1045 (2007).
- 775 79. Poinar, G. Orchid pollinaria (Orchidaceae) attached to stingless bees  
776 (Hymenoptera: Apidae) in Dominican amber. *Neues Jahrb. für Geol. und*  
777 *Paläontologie* **297**, 287–293 (2016).
- 778 80. Töpel, M. *et al.* SpeciesGeoCoder: Fast categorisation of species occurrences for  
779 analyses of biodiversity, biogeography, ecology and evolution. *BioRxiv* **9274**, 1–  
780 15 (2014).
- 781 81. Givnish, T. J. *et al.* Phylogeny, adaptive radiation, and historical biogeography in  
782 Bromeliaceae: Insights from an eight-locus plastid phylogeny. *Am. J. Bot.* **98**,  
783 872–895 (2011).
- 784 82. Matzke, N. J. Model selection in historical biogeography reveals that founder-  
785 event speciation is a crucial process in island clades. *Syst. Biol.* **63**, 951–970  
786 (2014).
- 787 83. Chamberlain, S., Ram, K. & Hart, T. spocc: Interface to Species Occurrence Data  
788 Sources. *R Packag. version 0.4.5*. <https://CRAN.R-project.org/package=spocc>  
789 (2016).
- 790 84. Hijmans, R. J. & Elith, J. Species distribution modeling with R. (2016).
- 791 85. Arrigo, N. *et al.* A total evidence approach to understanding phylogenetic  
792 relationships and ecological diversity in *Selaginella* subg. *Tetragonostachys*. *Am.*  
793 *J. Bot.* **100**, 1672–1682 (2013).
- 794 86. Oksanen, J. *et al.* Package ‘vegan’. *R Packag. ver. 2.0–8* (2013).  
795 doi:10.4135/9781412971874.n145
- 796 87. Romero-González, G. A. & Nelson, C. E. Sexual dimorphism in *Catasetum*  
797 orchids: forcible pollen emplacement and male flower competition. *Science* **232**,  
798 1538–1540 (1986).
- 799 88. Revell, L. J. phytools: an R package for phylogenetic comparative biology (and  
800 other things). *Methods Ecol. Evol.* **3**, 217–223 (2012).
- 801 89. Wickham, H. *GGPLOT2: elegant graphics for data analysis*. (Springer-Verlag,  
802 2009). doi:10.1007/978-0-387-98141-3
- 803 90. Gerlach, G. & Pérez-Escobar, O. A. Looking for missins swans: phylogenetics of  
804 *Cynoches*. *Orchids* **83**, 434–437 (2014).
- 805 91. FitzJohn, R. G. Analysing diversification with diversitree. *R Packag. ver. 0.9–2*  
806 (2010).
- 807 92. Rabosky, D. L. & Goldberg, E. E. Model inadequacy and mistaken inferences of  
808 trait-dependent speciation. *Syst. Biol.* **64**, 340–355 (2015).

809

810

## 811 Acknowledgements

812 We are grateful to Martina Silber (Munich, Germany) for valuable assistance  
 813 provided during lab work, to Mario Blanco (San José, Costa Rica), Diego Bogarín (San  
 814 José, Costa Rica), Norman Cash and family (Managua, Nicaragua) for assistance during  
 815 field trips, and to Gustavo Romero (Herbarium HUH, Cambridge, U.S.A) and Mario  
 816 Blanco (University of Costa Rica) for providing plant material. Adarilda Petini-Bennelli  
 817 provided vegetal material of Catasetinae. Paula Rudall and Richard Bateman critically  
 818 read the manuscript. To R. Camara, for discussions. The handling editor and two  
 819 anonymous reviewers for providing critical comments to the manuscript. This work was  
 820 supported by the Colombian Administrative Department of Science and Technology  
 821 (COLCIENCIAS; granted to OAPE, ref. 512). F.L.C. has benefited from an  
 822 “Investissements d’Avenir” grant managed by Agence Nationale de la Recherche  
 823 (CEBA, ref. ANR-10-LABX-25-01).

824

## 825 **Author contributions**

826 O.A.P.E., G.C., F.L.C., J.V. and J.H. designed research; A.M and E.S. collected  
 827 samples; A.M., E.S. and O.P. performed the lab work; O.A.P.E., F.L.C., and G.C.  
 828 performed all analyses; O.A.P.E., G.C., F.L.C., J.V., B.K., J.H., G.G., A.M., and E.S.  
 829 wrote the manuscript.

830

## 831 **Competing financial interest**

832 The authors declare no competing financial interest.

# 1    **Tables**

2    **Table 1.** Best models and parameter values of BiSSE analysis on lineages with ESD  
3    vs. alternative sexual systems, epiphytism vs. other plant habits, and male euglossine-  
4    bee pollination vs. other pollination systems.

5

# 6    **Figures**

7    **Fig. 1.** Best scoring ML tree of Catasetinae (B) and sister subtribes (i.e. Eulophiinae,  
8    Dipodiinae, Oncidiinae, Cyrtopodiinae, Cymbidiinae; A) obtained from non-  
9    conflicting concatenated nuclear and plastid loci. Node pie-diagrams indicate  
10   Bootstrap percentage values (MLBS > 75), where fully black diagrams indicate  
11   MLBS of 100. Asterisks represent BPP values higher than 0.95. Representatives of  
12   each clade in Catasetinae (except *Cyanaeorchis*) are shown in pictures [inset:  
13   *Catasetum*: *Ca. ochraceum*; *Clowesia*: *Cl. russelliana*; *Cycnoches*: *Cyc. lehmannii*;  
14   *Dressleria*: *D. eburnea*; *Galeandra*: *Ga. macroplectron*; *Grobya*: *G. galeata*;  
15   *Mormodes*: *M. punctata*]. Pictures by: O. Pérez and G. Gerlach.

16   **Fig. 2.** Chronogram of Catasetinae and sister subtribes obtained under a relaxed clock  
17   model, applied to a non-conflicting, concatenated nuclear and plastid loci. Minimum  
18   and maximum age intervals are provided in Fig. S4. Time scale is provided in million  
19   years (Mya). Node charts correspond to ancestral areas estimated under the  
20   BAYAREA+J model. The LCA of Catasetinae is indicated with a black star and gains  
21   of ESD are indicated with red circles. Coded biogeographical areas are colour-coded  
22   following inset map, and are shown in front of taxa names (grey colours indicate taxa  
23   distributed in more than one biogeographical region). The approximate time span of  
24   Pebas and Acre mega-wetlands<sup>36</sup> is indicated by a grey rectangle. Inset: Coded areas

used for biogeographical analysis. Geopolitical boundaries map generated by ArcMAP (<http://www.sri.com>) using political divisions and elevation data from DIVA-GIS (<http://www.diva-gis.org/data>). Climate curve of the last 17 Myr represented as a function of oxygen-isotope records<sup>61</sup>.

**Fig. 3.** Evolution of ESD in Catantariinae and ancestral climatic-niche preferences depicted as traitgrams obtained via ACE analyses of mean values of bioclimatic variables. In all panels, coloured circles denote independent origins of ESD (colour-coded by chronological order). Colour coded branches denote lineages estimated to have ESD. Grey branches denote lineages inferred to have evolved alternative sexual systems (i.e. no ESD). Lineages in which ESD has evolved are color-coded accordingly. (A) Topological position of ESD origins (for posterior probabilities, see Fig. S6) (B) Annual mean temperature (Bio 1); (C) Mean diurnal range (Bio 2); (D) Isothermality (Bio 3); (E) Temperature seasonality (Bio 4); (F) Maximum temperature of warmest month (Bio 5); (G) Maximum temperature of coldest month (Bio 6); (H) Temperature annual range (Bio 7); (I) Mean temperature of wettest quarter (Bio 8); (J) Mean temperature of driest quarter (Bio 9); (K) Mean temperature of warmest quarter (Bio 10); (L) Mean temperature of coldest quarter (Bio 11); (M) Annual precipitation (Bio 12); (N) Precipitation of wettest month (Bio 13); (O) Precipitation of driest month (Bio 14); (P) Precipitation seasonality (Bio 15); (Q) Precipitation of wettest quarter (Bio 16); (R) Precipitation of driest quarter (Bio 17); (S) Precipitation of warmest quarter (Bio 18); (T) Precipitation of coldest quarter (Bio 19); (U) Altitude (meters). Note the little divergence through time of ancestral mean bioclimatic variables between lineages having ESD, and those with alternative sexual systems.

#### Supplementary material

50     **Appendix S1.** Extended Materials and Methods, supplementary tables and figures.

1     **Table 1**

| Trait                           | Model                 | logL <sup>1</sup> | AICc <sup>2</sup> | μ <sup>3</sup> (0) | μ (1) | μ ratio<br>(μ <sub>1</sub> /μ <sub>0</sub> ) | μ <sup>4</sup> (0) |
|---------------------------------|-----------------------|-------------------|-------------------|--------------------|-------|----------------------------------------------|--------------------|
| ESD                             | <i>M</i> <sub>2</sub> | -248.854          | 506.035           | 1.253              | 2.024 | 1.614                                        | -                  |
| Male euglossine-bee pollination | <i>M</i> <sub>2</sub> | -240.045          | 488.416           | 1.827              | 2.138 | 1.174                                        | -                  |
| Epiphytism                      | <i>M</i> <sub>6</sub> | -253.720          | 517.931           | 1.276              | 1.56p | 1.2507                                       | -                  |

2

3     <sup>1</sup>log Likelihood

4     <sup>2</sup>Akaike Informative Criterion corrected

5     <sup>3</sup>Speciation rates

6     <sup>4</sup>Extinction rates

7     <sup>5</sup>transition rates from state 0 to 1

8     <sup>6</sup>transition rates from state 1 to 0

9

10

11

12

13

14

15

16

17

18

19

20

21

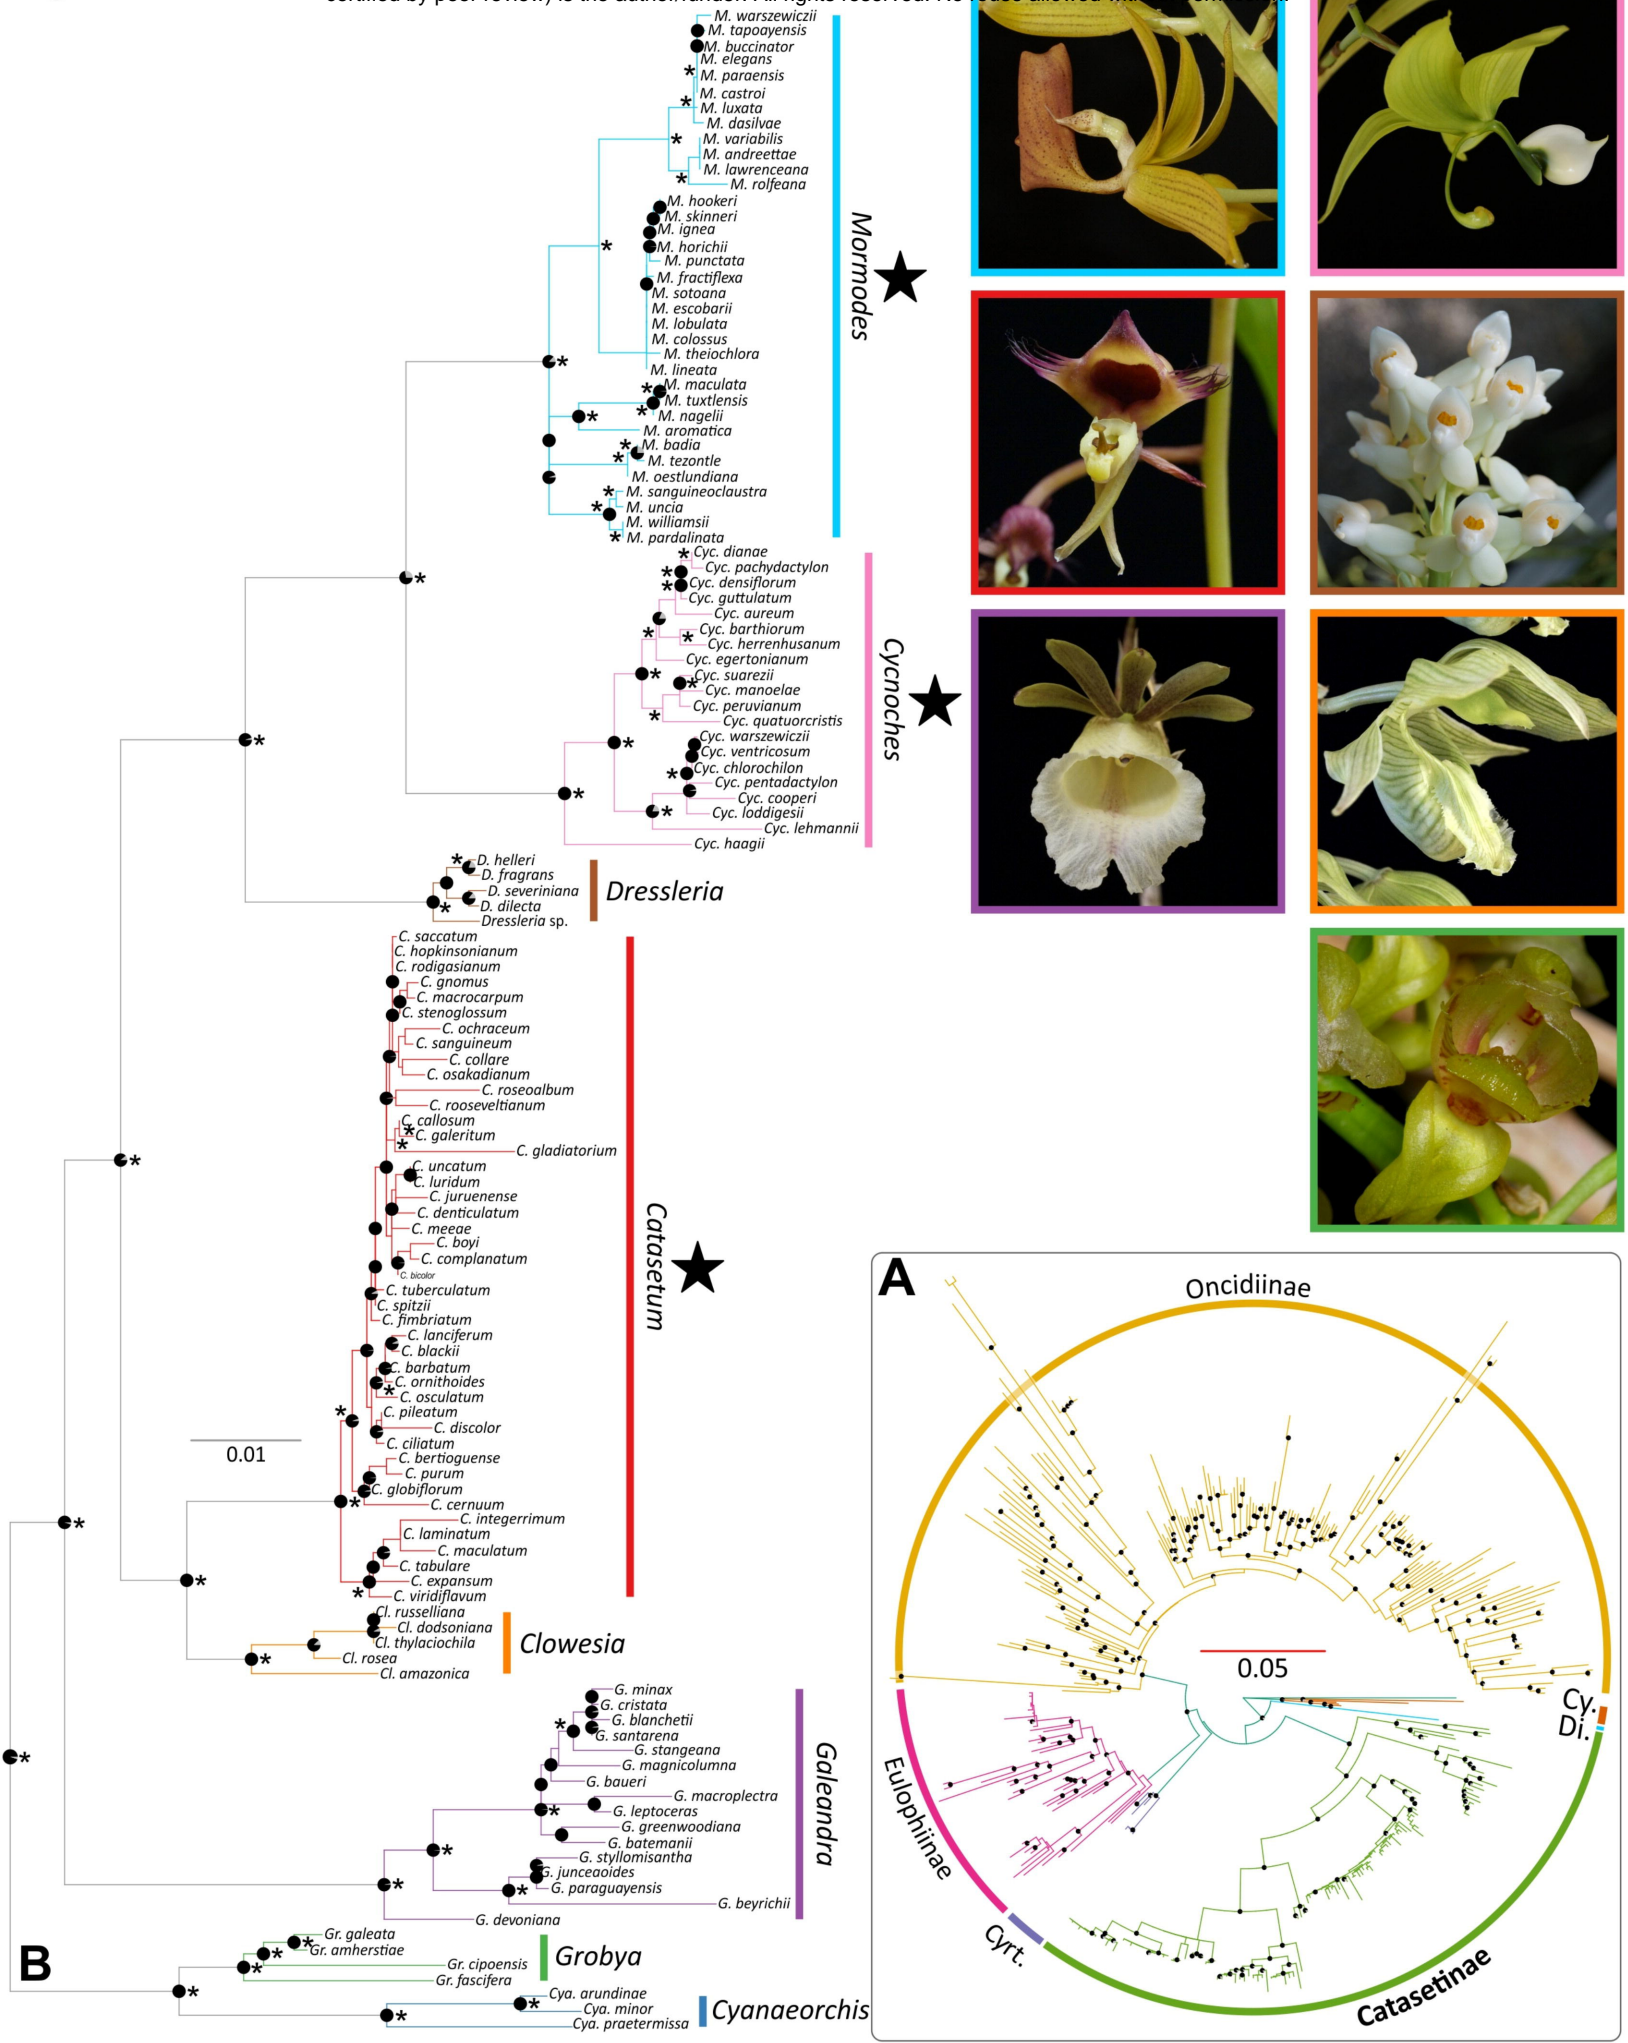

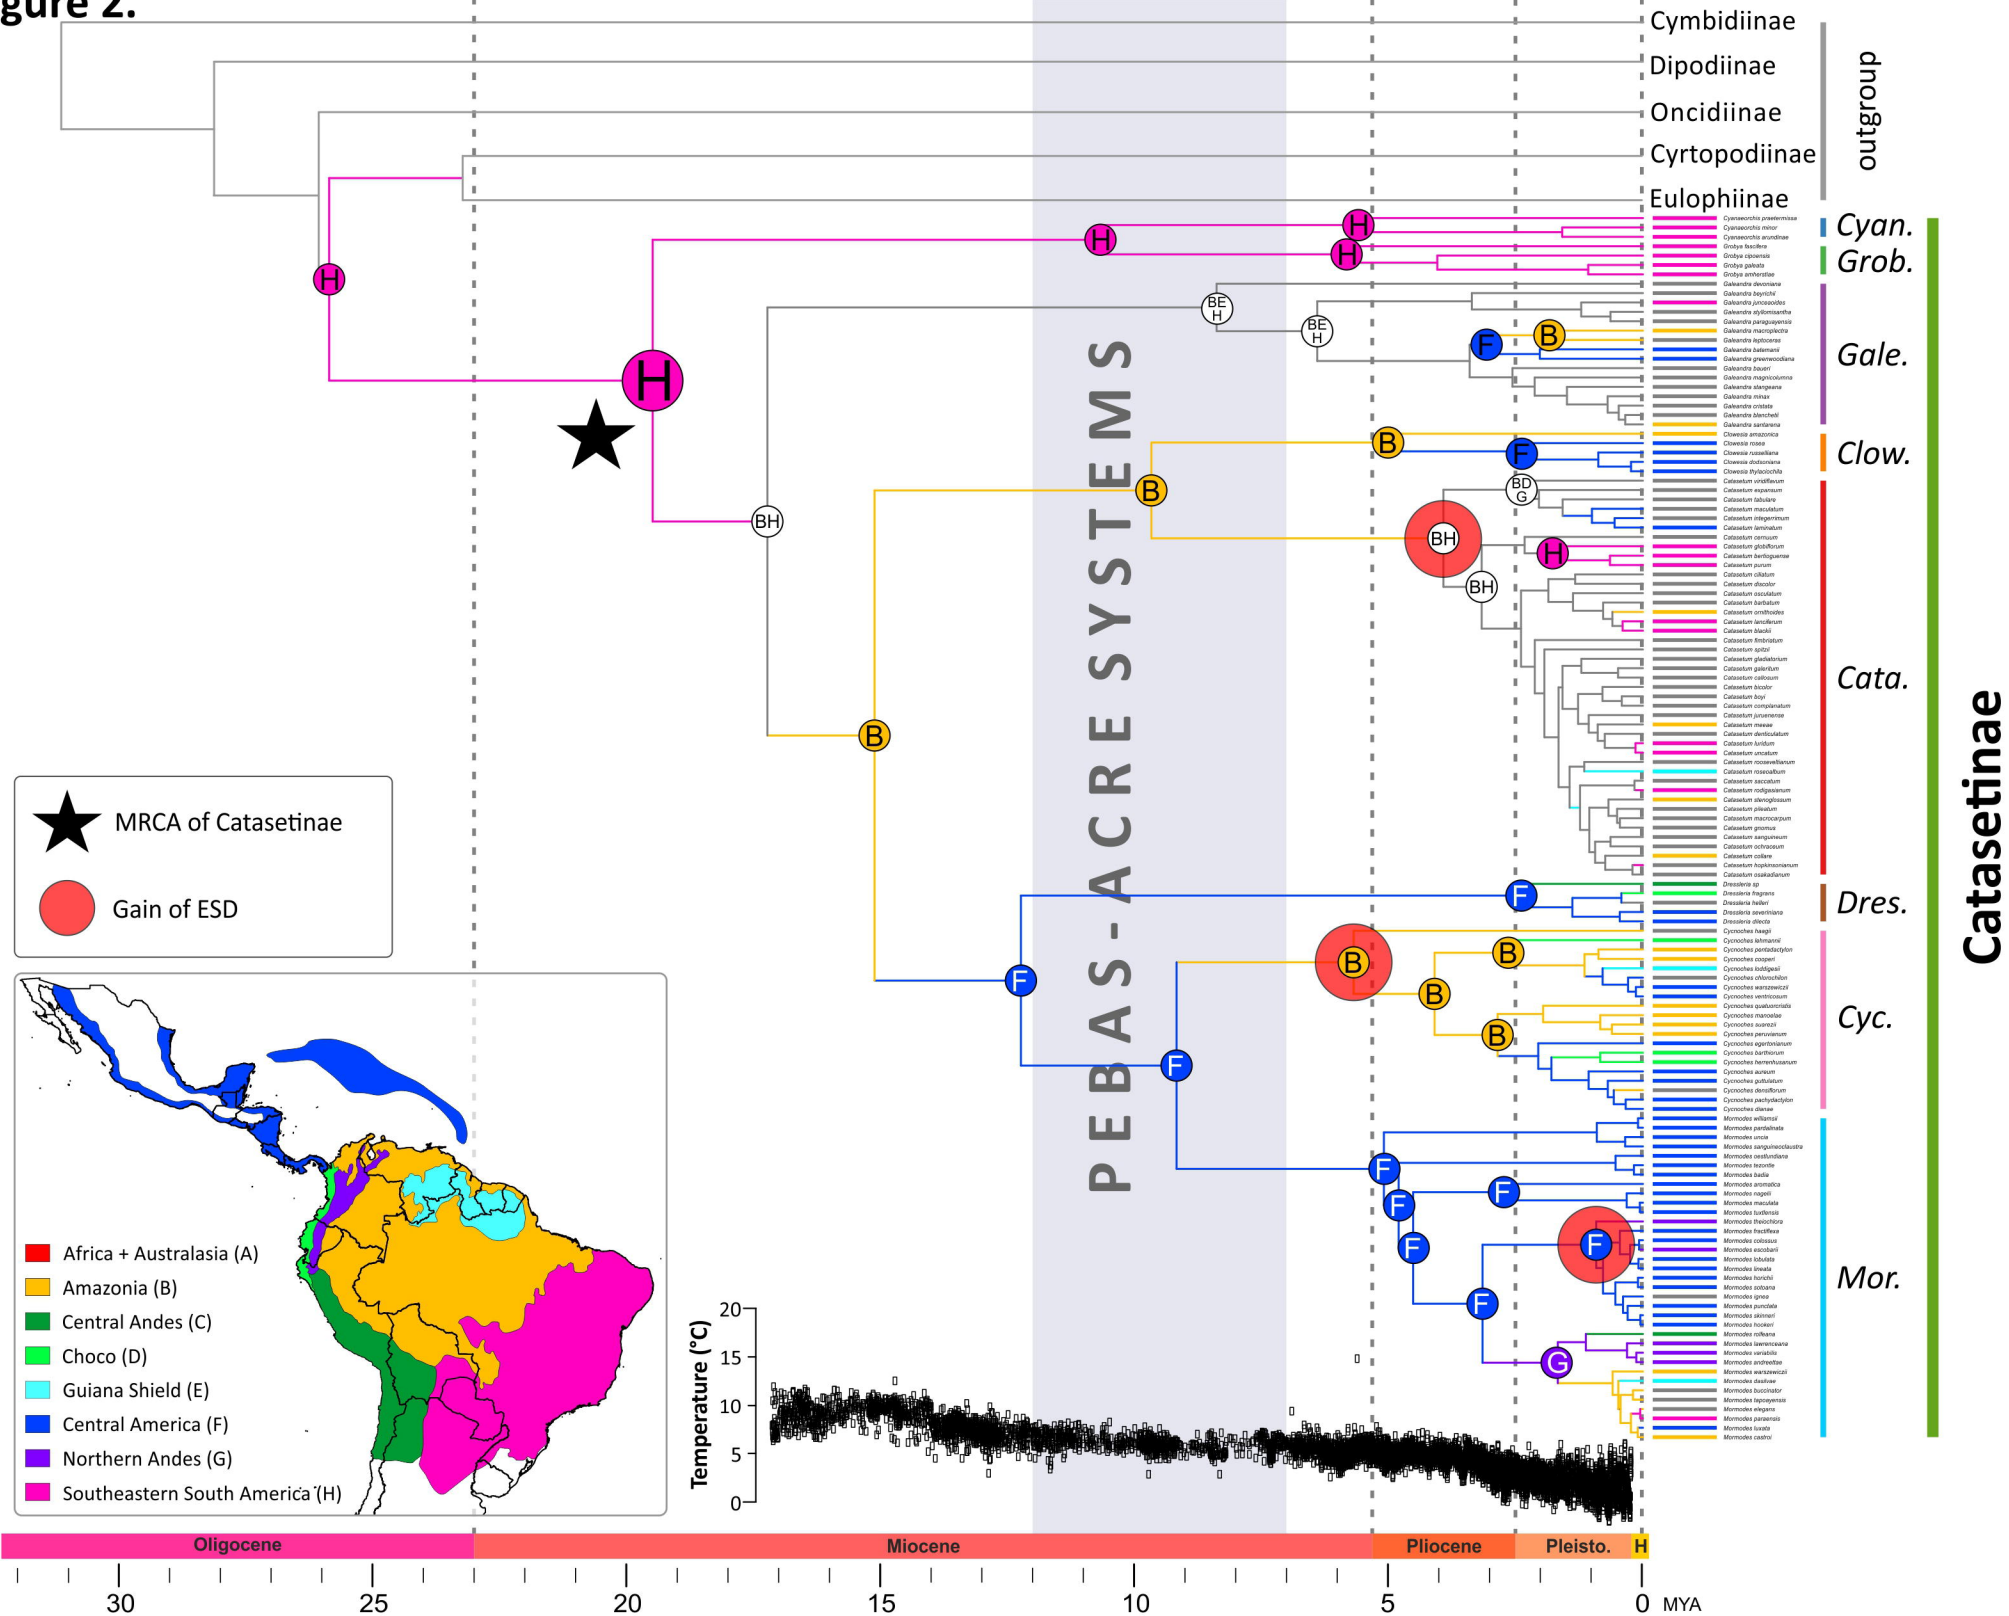

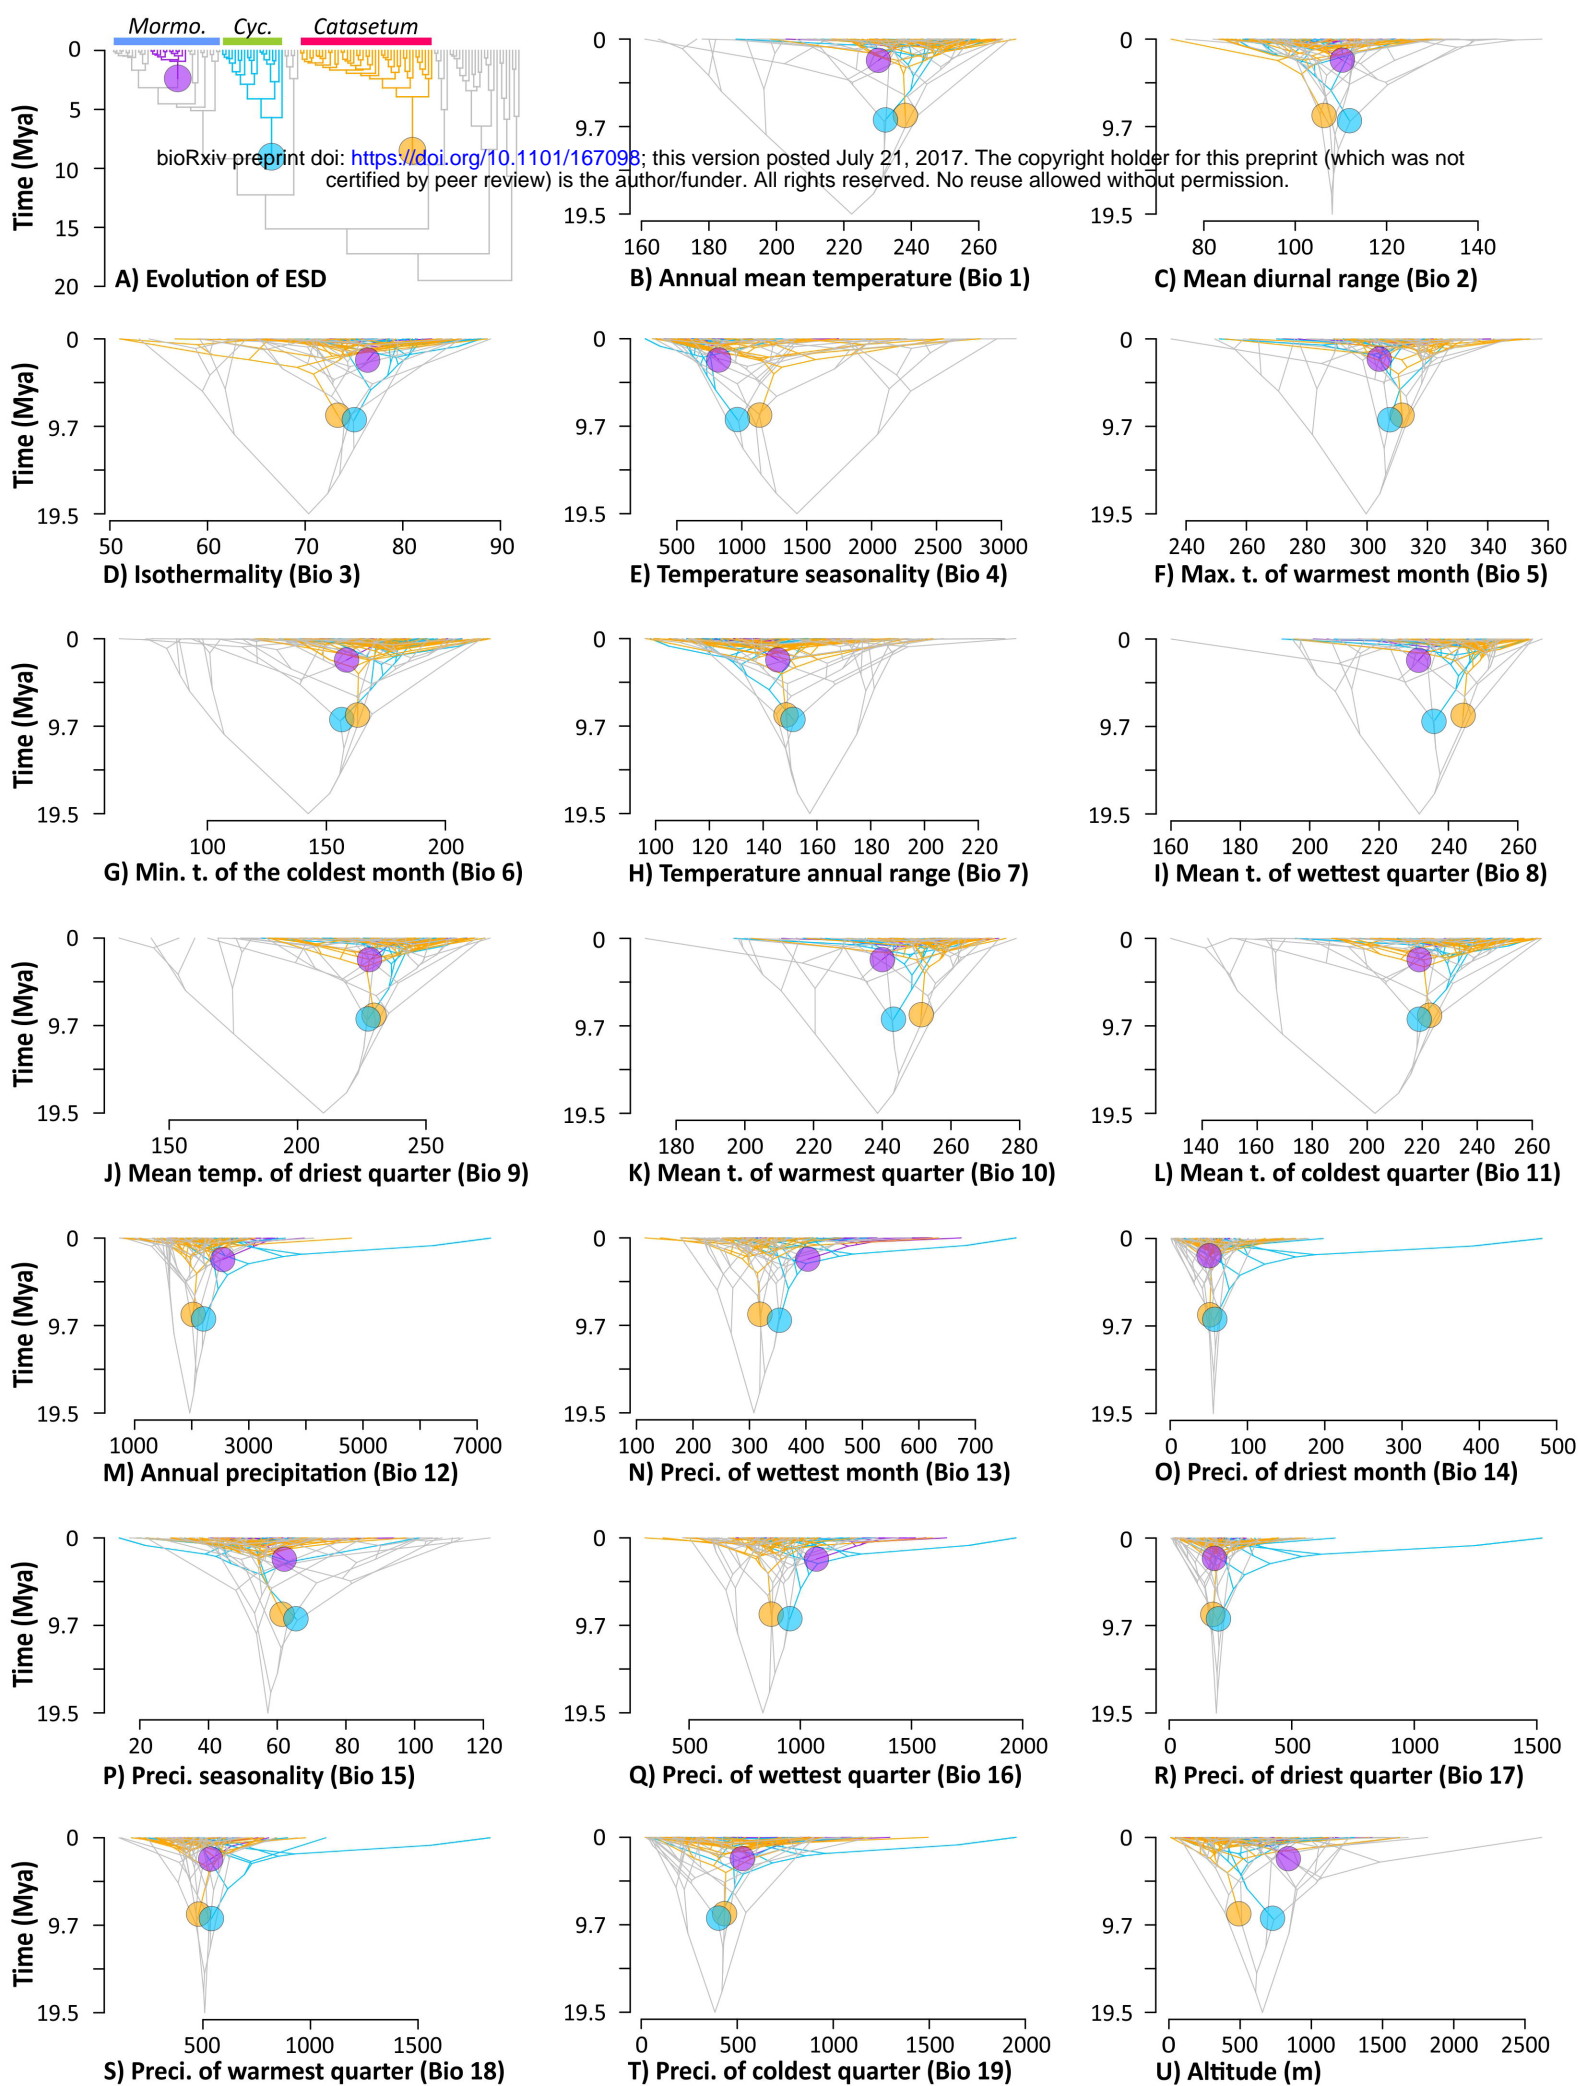

### Legends

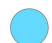

First gain of ESD

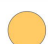

Second gain of ESD

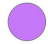

Third gain of ESD

*Catasetum*

*Cycnoches*

*Mormodes*
